# Supplementary material for: Insight into the characteristics of microbial communities in a single-stage anammox reactor under different oxygen conditions
Source: Royal Society of Chemistry journal article supplement (doi:10.1039/d1ew00547b), 2021-12-09
Supplement: d1ew00547b1.pdf [file d1ew00547b1.pdf]

## Supplementary Information for Publication

### **Insight into the characteristics of microbial community in single-stage anammox reactor under different oxygen conditions**

Zhaoyang Li<sup>a</sup>, Zheng Ge<sup>a</sup>, Jialin Li<sup>a</sup>, Shenhua Yang<sup>a</sup>, Yongzhen Peng<sup>a</sup>, Liang Zhang<sup>a</sup>,

\*

*<sup>a</sup> National Engineering Laboratory for Advanced Municipal Wastewater Treatment and Reuse Technology, Key Laboratory of Beijing for Water Quality Science and Water Environment Recovery Engineering, Beijing University of Technology, Beijing, 100124, P.R. China*

*\* Corresponding author: Liang Zhang*

*E-mail addresses: zliang@bjut.edu.cn*

---

**Figure and Table captions**

Table S1. upstream analysis results of 16S rRNA gene sequencing

| A. raw data profile            |                    |        |
|--------------------------------|--------------------|--------|
| total reads count (single-end) | 2039675            |        |
| average Q30                    | 96.20%             |        |
| average Q20                    | 99%                |        |
| total reads count after merger | 1446925            |        |
| B. sample size status          |                    |        |
| OTUs counts                    | 582                |        |
|                                | minimum            | 129139 |
|                                | 25th percentile    | 148353 |
|                                | median             | 163404 |
| raw sample size (reads count)  | 75th percentile    | 170176 |
|                                | maximum            | 191530 |
|                                | average            | 160769 |
|                                | normalization size | 120000 |

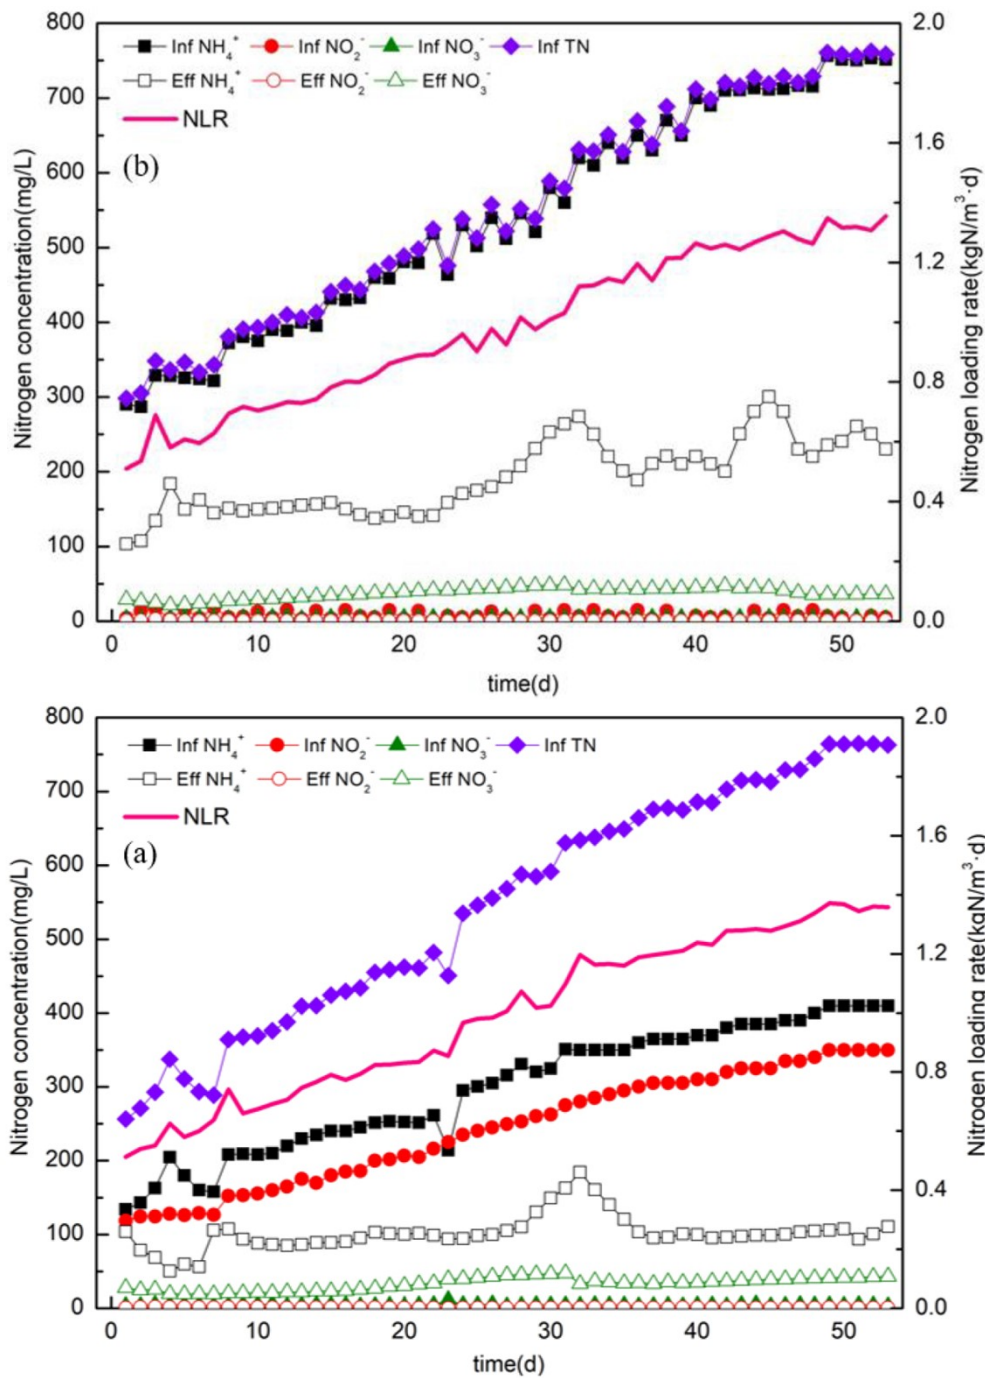

Figure S1. The variation of nitrogen concentration and nitrogen loading rate of the two MBRs in 1-56 d; (a) MBR-O under micro-aerobic condition; (b) MBR-A under anoxic condition (further data under stable operation period were not shown)

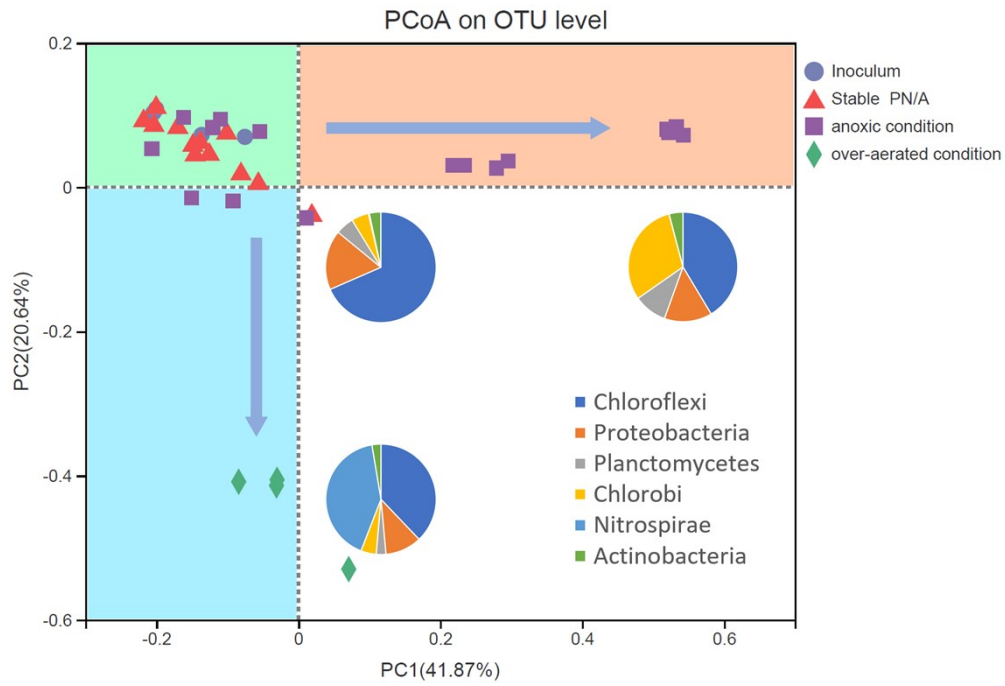

Figure S2. Community dynamics under different conditions characterized by principal coordinate analysis with pie graph of top five phyla

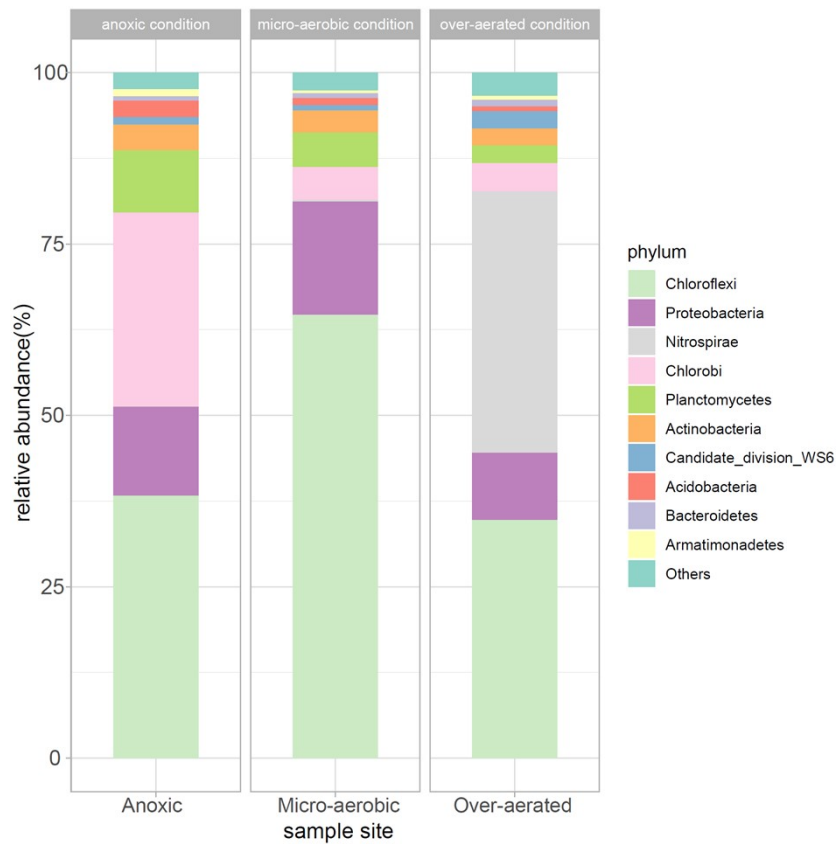

Figure S3. The top 10 phyla of the entire microbial community composition under different conditions
